# Supplementary material for: Left Ventricular Apical Aneurysm in Fabry Disease: Implications for Clinical Significance and Risk Stratification
Source: PubMed Central journal article supplement — J Am Heart Assoc. 2022 Dec 30;12(1):e027041. doi: 10.1161/JAHA.122.027041 (PMC9973567; doi:10.1161/jaha.122.027041), 2022-12-30

# **SUPPLEMENTAL MATERIAL**

**Table S1. Association between baseline characteristics and presence of apical aneurysm.**

| <b>Variables</b>                | <b>Odds ratio</b> | <b>95% CI</b> | <b>P</b>         |
|---------------------------------|-------------------|---------------|------------------|
| <b>Clinical characteristics</b> |                   |               |                  |
| Age                             | 1.09              | 1.02-1.16     | <b>0.01</b>      |
| Male                            | 3.16              | 0.79-12.67    | 0.1              |
| BMI                             | 1.02              | 0.89-1.17     | 0.8              |
| NYHA class III/IV               | 4.66              | 1.01-21.61    | <b>0.049</b>     |
| eGFR                            | 1.00              | 0.98-1.02     | 1                |
| Classical type                  | 0.57              | 0.07-4.82     | 0.6              |
| IVS4 mutation                   | 1.48              | 0.30-7.35     | 0.6              |
| Hypertension                    | 0.60              | 0.16-2.17     | 0.4              |
| Diabetes                        | 0.49              | 0.06-4.08     | 0.5              |
| Atrial fibrillation             | 11.96             | 3.04-47.05    | <b>&lt;0.001</b> |
| <b>Echocardiography</b>         |                   |               |                  |
| LVEF < 40%                      | 9.30              | 0.54-160.38   | 0.1              |
| LV mass index                   | 1.01              | 1.00-1.01     | <b>0.03</b>      |

|              |      |           |              |
|--------------|------|-----------|--------------|
| LA dimension | 1.15 | 1.04-1.26 | <b>0.004</b> |
| Average E/e' | 1.14 | 1.04-1.25 | <b>0.006</b> |

### **CMR**

|     |      |            |     |
|-----|------|------------|-----|
| LGE | 3.10 | 0.55-17.60 | 0.2 |
|-----|------|------------|-----|

---

BMI = body mass index; CI = confidence interval; eGFR = estimated glomerular

filtration rate; LA = left atrium; LGE = late gadolinium enhancement; LVEF = left

ventricular ejection fraction; LV = left ventricle; NYHA = New York Heart

Association.

**Figure S1. Comparison of the proportion of adverse cardiovascular events between the groups with normal LV mass index, LVH without LVAA, and LVH with LVAA.**

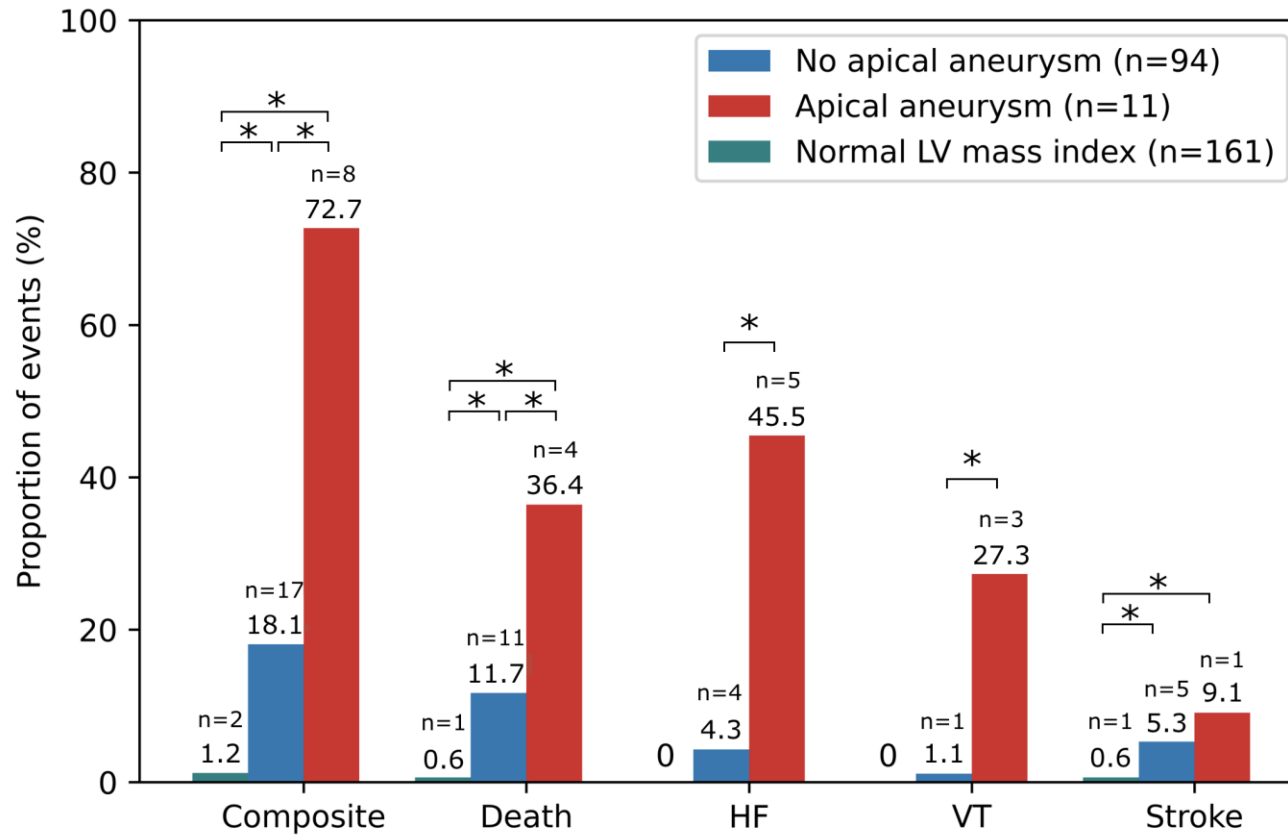

Supplement: JAH3-12-e027041-s001.pdf [file JAH3-12-e027041-s001.pdf]
